# Supplementary material
Source: HighWire-hosted journal article supplement (https://openheart.bmj.com/content/5/2/e000846)
Supplement: inline-supplementary-material-1 [file inline-supplementary-material-1.docx]

**Search terms and results by database**

**PubMed**

Date: 8/23/17

“Cardiovascular Diseases”[Mesh] OR “cardiovascular disease”[TIAB] OR “cardioavascular disease”[TIAB] OR “cardiovascular diseases”[TIAB] OR “cardioavascular diseases”[TIAB]

OR

“Myocardial Infarction”[Mesh] OR “myocardial infarction”[TIAB] OR “myocardial infarct”[TIAB] OR “myocardial infarcation”[TIAB] OR “myocardial infarcted”[TIAB]

OR

“heart attack”[TIAB] OR “heart attacks”[TIAB] OR “ischaemic heart disease” OR “ischemic heart disease” OR "myocardial ischemia"[MeSH Terms] OR "myocardial ischemia"[TIAB] OR "myocardial ischaemia"[TIAB] OR “Heart Arrest”[Mesh] OR “heart arrest”[TIAB] OR “heart arrests”[TIAB] OR “heart disease”[TIAB] OR “heart diseases”[TIAB] OR “Coronary Disease”[Mesh] OR “Coronary Artery Disease”[Mesh] OR “coronary disease”[TIAB]

OR

“coronary event”[TIAB] OR “coronary events”[TIAB] OR “cardiovascular mortality”[TIAB] OR “cardiovascular mortalities”[TIAB] OR “cardiac mortality”[TIAB] OR “cardiac mortalities”[TIAB]

OR “cardiovascular death”[TIAB] OR “cardiovascular deaths”[TIAB] OR “Death, Sudden, Cardiac”[Mesh] OR “cardiac death”[TIAB] OR "cardiac deaths”[TIAB]

OR

“Cerebrovascular Disorders”[Mesh] OR “cerebrovascular disorder”[TIAB] OR “cerebrovascular disorders”[TIAB] OR “cerebrovascular accident”[TIAB] OR “cerebrosvascular accident”[TIAB] OR “cerebrovascular accidents”[TIAB] OR “cerebrovascular event”[TIAB] OR “cerebrovascular events”[TIAB]

OR “cerebrovascular disease”[TIAB] OR “cerebrovascular diseases”[TIAB]

OR

Stroke[Mesh Terms] OR stroke*[TIAB] OR “brain ischemia”[TIAB] OR “brain ischaemia”[TIAB] OR “Brain Ischemia”[Mesh] OR “ischemic stroke”[TIAB] OR “ischaemic stroke”[TIAB]

OR

“Intracranial Hemorrhages”[Mesh] OR “Cerebral Hemorrhage”[Mesh] OR “intracranial

hemorrhage”[TIAB] OR “intracranial hemorrhages”[TIAB] OR “intracranial haemorrhage”[TIAB] OR “intracranial haemorrhages”[TIAB] OR “cerebral hemorrhage”[TIAB] OR “cerebral hemorrhages”[TIAB] OR “cerebral haemorrhage”[TIAB] OR “cerebral haemorrhages”[TIAB]

Results = 2,309,097

AND

snuff[TIAB] OR snus[TIAB] OR "chewing tobacco"[TIAB] OR “dip tobacco”[TIAB] OR “dipping tobacco”[TIAB] OR “spit tobacco” OR iqmik[TIAB] OR “smokeless tobacco"[TIAB] OR "chew tobacco"[TIAB] OR "oral tobacco"[TIAB] OR (dissolvable[TIAB] AND (tobacco[TIAB] OR nicotine[TIAB] OR “Tobacco Products”[Mesh] OR Smoking[Mesh Terms] OR “Tobacco Use Cessation Products”[Mesh] OR “Tobacco Use Disorder”[Mesh])) OR ("tobacco products"[Mesh] AND (powder[TIAB] OR gel[TIAB] OR paste[TIAB] OR orb*[TIAB] OR strip*[TIAB] OR stick*[TIAB] OR lozenge*[TIAB])) OR “Tobacco, Smokeless”[Mesh]

Results = 4,845

CVD terms AND smokeless tobacco terms Results = 307

**EMBASE**

Date: 8/23/2017

“Cardiovascular Disease”/exp OR “cardiovascular disease”:ti,ab OR “cardioavascular disease”:ti,ab OR “cardiovascular diseases”:ti,ab OR “cardioavascular diseases”:ti,ab

OR

“heart infarction”/exp OR “myocardial infarction”:ti,ab OR “myocardial infarct”:ti,ab OR “myocardial infarcation”:ti,ab OR “myocardial infarcted”:ti,ab

OR

“heart attack”:ti,ab OR “heart attacks”:ti,ab OR “ischaemic heart disease” OR “ischemic heart disease” OR " heart muscle ischemia "/exp OR "myocardial ischemia":ti,ab OR "myocardial ischaemia":ti,ab

OR

“Heart Arrest”/exp OR “heart arrest”:ti,ab OR “heart arrests”:ti,ab OR “heart disease”:ti,ab OR “heart diseases”:ti,ab OR “Coronary Artery Disease”/exp OR “coronary disease”:ti,ab

OR

“coronary event”:ti,ab OR “coronary events”:ti,ab OR “cardiovascular mortality”:ti,ab OR “cardiovascular mortalities”:ti,ab OR “cardiac mortality”:ti,ab OR “cardiac mortalities”:ti,ab OR “cardiovascular death”:ti,ab OR “cardiovascular deaths”:ti,ab OR “sudden cardiac death”/exp OR “cardiac death”:ti,ab OR "cardiac deaths”:ti,ab

OR

“cerebrovascular disease”/exp OR “cerebrovascular disorder”:ti,ab OR “cerebrovascular disorders”:ti,ab OR “cerebrovascular accident”:ti,ab OR “cerebrosvascular accident”:ti,ab OR “cerebrovascular accidents”:ti,ab OR “cerebrovascular event”:ti,ab OR “cerebrovascular events”:ti,ab OR “cerebrovascular disease”:ti,ab OR “cerebrovascular diseases”:ti,ab

OR

“cerebrovascular accident”/exp OR stroke*:ti,ab OR “brain ischemia”:ti,ab OR “brain ischaemia”:ti,ab OR “Brain Ischemia”/exp OR “ischemic stroke”:ti,ab OR “ischaemic stroke”:ti,ab

OR

“brain hemorrhage”/exp OR “intracranial hemorrhage”:ti,ab OR “intracranial hemorrhages”:ti,ab OR “intracranial haemorrhage”:ti,ab OR “intracranial haemorrhages”:ti,ab OR “cerebral hemorrhage”:ti,ab OR “cerebral hemorrhages”:ti,ab OR “cerebral haemorrhage”:ti,ab OR “cerebral haemorrhages”:ti,ab

Results = 3,985,467

AND

snuff:ti,ab OR snus:ti,ab OR "chewing tobacco":ti,ab OR “dip tobacco”:ti,ab OR “dipping tobacco”:ti,ab OR “spit tobacco” OR iqmik:ti,ab OR “smokeless tobacco":ti,ab OR "chew tobacco":ti,ab OR "oral tobacco":ti,ab OR (dissolvable:ti,ab AND (tobacco:ti,ab OR nicotine:ti,ab OR “tobacco”/exp OR smoking/exp OR “tobacco dependence”/exp)) OR ("tobacco products"/exp AND (powder:ti,ab OR gel:ti,ab OR paste:ti,ab OR orb*:ti,ab OR strip*:ti,ab OR stick*:ti,ab OR lozenge*:ti,ab)) OR “smokeless tobacco”/exp

Results = 6328

NOT (snuffbox OR snuff-box)

CVD terms AND smokeless tobacco terms NOT snuffbox

Results = 592

**Web of Science**

Date: 8/23/2017

“cardiovascular disease” OR “cardioavascular disease” OR “heart infarc*” OR “myocardial infarc*” OR “heart attack”

OR

Ischaemi* NEAR/3 (heart OR myocardia* OR disease* OR brain OR cerebral OR stroke)

OR

Ischemi* NEAR/3 (heart OR myocardia* OR disease* OR brain OR cerebral OR stroke)

“heart arrest” OR “heart disease” OR “coronary artery disease” OR “coronary disease” OR “coronary event” OR “cardiovascular mortality” OR “cardiac mortality” OR “cardiovascular death” OR “cardiac death”

OR

cerebrovascular NEAR/3 (disease OR disorder OR accident OR event)

OR

stroke* OR “brain hemorrhage” OR “brain haemorrhage” OR “intracranial hemorrhage” OR “intracranial haemorrhage” OR “intracranial haemorrhage” OR “cerebral hemorrhage” OR “cerebral haemorrhage”

Results = 940,292

snuff OR snus OR "chew* tobacco" OR “dip* tobacco” OR “spit* tobacco” OR iqmik OR “smokeless tobacco" OR "oral tobacco" OR (dissolvable NEAR/3 (tobacco OR nicotine OR smoking)) OR (tobacco NEAR/3 (powder OR gel OR paste OR orb* OR strip* OR stick* OR lozenge*))

Results = 4291

NOT (snuffbox OR snuff-box)

CVD terms AND smokeless tobacco terms NOT snuffbox

Results = 289

**Ebscohost – Academic Search Complete, CINAH and PsycInfo**

Date: 8/24/2017

“cardiovascular disease” OR “cardioavascular disease” OR “heart infarc*” OR “myocardial infarc*” OR “heart attack”

OR

Ischaemi* NEAR/3 (heart OR myocardia* OR disease* OR brain OR cerebral OR stroke)

OR

Ischemi* NEAR/3 (heart OR myocardia* OR disease* OR brain OR cerebral OR stroke)

“heart arrest” OR “heart disease” OR “coronary artery disease” OR “coronary disease” OR “coronary event” OR “cardiovascular mortality” OR “cardiac mortality” OR “cardiovascular death” OR “cardiac death”

OR

cerebrovascular NEAR/3 (disease OR disorder OR accident OR event)

OR

stroke* OR “brain hemorrhage” OR “brain haemorrhage” OR “intracranial hemorrhage” OR “intracranial haemorrhage” OR “intracranial haemorrhage” OR “cerebral hemorrhage” OR “cerebral haemorrhage”

Results = 601,845

snuff OR snus OR "chew* tobacco" OR “dip* tobacco” OR “spit* tobacco” OR iqmik OR “smokeless tobacco" OR "oral tobacco" OR (dissolvable NEAR/3 (tobacco OR nicotine OR smoking)) OR (tobacco NEAR/3 (powder OR gel OR paste OR orb* OR strip* OR stick* OR lozenge*))

Results = 5677

NOT (snuffbox OR snuff-box)

CVD terms AND smokeless tobacco terms NOT snuffbox

Results = 205
